# Supplementary material
Source: PubMed Central journal article supplement (PMC10524356)
Supplement: NIHMS1900436-supplement-2.pdf [file NIHMS1900436-supplement-2.pdf]

**Table S1. Data collection and refinement statistics.**

|                                  | HIV-2 <sub>CTD</sub>      |
|----------------------------------|---------------------------|
| <b>Data Collection</b>           |                           |
| Wavelength (Å)                   | 0.979                     |
| Resolution range (Å)             | 24.4 - 1.98 (2.05 - 1.98) |
| Space group                      | C2                        |
| Unit cell                        |                           |
| <i>a,b,c</i> (Å)                 | 48.813, 30.919, 46.494    |
| $\alpha,\beta,\gamma$ (°)        | 90, 90.561, 90            |
| Total reflections                | 13142 (1335)              |
| Unique reflections               | 4779 (489)                |
| Multiplicity                     | 2.7 (2.7)                 |
| Completeness (%)                 | 95.44 (95.66)             |
| <i>I</i> / $\sigma$ ( <i>I</i> ) | 11.41 (3.29)              |
| R-merge                          | 0.0624 (0.267)            |
| R-meas                           | 0.0762 (0.326)            |
| R-pim                            | 0.0430 (0.185)            |
| CC <sub>1/2</sub>                | 0.997 (0.963)             |
| <b>Refinement</b>                |                           |
| Reflections used                 | 4761 (485)                |
| # for R-free                     | 237 (27)                  |
| R-work                           | 0.2239 (0.3252)           |
| R-free                           | 0.2495 (0.3944)           |
| Number of non-hydrogen atoms     | 659                       |
| Macromolecules                   | 644                       |
| Solvent                          | 15                        |
| Protein residues                 | 83                        |
| RMSD                             |                           |
| Bond lengths (Å)                 | 0.003                     |
| Bond angles (°)                  | 0.60                      |
| Ramachandran plot                |                           |
| Favored (%)                      | 97.53                     |
| Allowed (%)                      | 2.47                      |
| Outliers (%)                     | 0.00                      |
| Average B-factor                 | 49.45                     |
| Macromolecules                   | 49.62                     |
| Solvent                          | 42.34                     |

Statistics for the highest-resolution shell are shown in parentheses.

**Table S2. Cryo-EM data collection**

| <b>Imaging Mode</b>                          | <b>Single Particle</b> | <b>Cryo ET</b>   |
|----------------------------------------------|------------------------|------------------|
| <b><i>Data Collection</i></b>                |                        |                  |
| Microscope                                   | FEI Titan Krios        | FEI Titan Krios  |
| Voltage (kV)                                 | 300                    | 300              |
| Magnification                                | 105,000×               | 105,000×         |
| Energy-filter (eV)                           | 20                     | 20               |
| Detector                                     | Gatan K2 Summit        | Gatan K2 Summit  |
| Recording Mode                               | Super-resolution       | Super-resolution |
| Pixel size (Å/pixel)                         | 1.32                   | 1.32             |
| Defocus range setting (µm)                   | 0.75 to 2.25           | 2.5              |
| Total Dose (e <sup>-</sup> /Å <sup>2</sup> ) | 50-60                  | 50               |
| Dose rate (e <sup>-</sup> /sec/pixel)        | 8.7                    | 1.1              |
| Exposure time (sec)                          | 10.0                   | 2.0              |
| Frame number                                 | 40                     | 8 per tilt       |
| Dataset size                                 | 2508 micrographs       | 63 tilt series   |
| Tilt range                                   | N/A                    | ±60              |
| Tilt step                                    | N/A                    | 3                |

**Table S3. HIV-2 lattice morphology**

| <b>Index</b> | <b>Tomogram</b> | <b>N. of initial sampling points</b> | <b>Radius (nm)</b> | <b>Surface area coverage (%)</b> | <b>N. of Gag molecules</b> |
|--------------|-----------------|--------------------------------------|--------------------|----------------------------------|----------------------------|
| 1            | HIV2ts3_02      | 31067                                | 66                 | 88                               | 5364                       |
| 2            | HIV2ts3_02      | 30220                                | 64                 | 78                               | 4734                       |
| 3            | HIV2ts3_02      | 36533                                | 71                 | 78                               | 5724                       |
| 4            | HIV2ts3_02      | 14930                                | 45                 | 63                               | 2100                       |
| 5            | HIV2ts3_02      | 27651                                | 62                 | 70                               | 3996                       |
| 6            | HIV2ts3_02      | 17142                                | 62                 | N/A                              | 2670                       |
| 7            | HIV2ts3_03      | 36909                                | 71                 | 76                               | 5532                       |
| 8            | HIV2ts3_03      | 33605                                | 68                 | 75                               | 5112                       |
| 9            | HIV2ts3_03      | 22931                                | 56                 | 72                               | 3378                       |
| 10           | HIV2ts3_03      | 23501                                | 57                 | 83                               | 3702                       |
| 11           | HIV2ts3_03      | 23053                                | 56                 | 66                               | 3378                       |
| 12           | HIV2ts3_27      | 26151                                | 60                 | 79                               | 4104                       |
| 13           | HIV2ts3_27      | 24491                                | 58                 | 74                               | 3666                       |
| 14           | HIV2ts3_27      | 27088                                | 61                 | 83                               | 4284                       |
| 15           | HIV2ts3_27      | 21712                                | 55                 | 89                               | 3624                       |
| 16           | HIV2ts3_27      | 22541                                | 56                 | 76                               | 3468                       |
| 17           | HIV2ts3_27      | 32274                                | 69                 | N/A                              | 4956                       |
| 18           | HIV2ts3_37      | 23008                                | 56                 | 78                               | 3702                       |
| 19           | HIV2ts3_37      | 26910                                | 61                 | 80                               | 4302                       |
| 20           | HIV2ts3_37      | 21962                                | 55                 | 75                               | 3384                       |
| 21           | HIV2ts3_37      | 12483                                | 42                 | 61                               | 1674                       |
| 22           | HIV2ts3_49      | 25778                                | 60                 | 88                               | 4398                       |
| 23           | HIV2ts3_49      | 18761                                | 51                 | 59                               | 2466                       |

---

|    |            |       |    |     |      |
|----|------------|-------|----|-----|------|
| 24 | HIV2ts3_49 | 20685 | 61 | N/A | 3720 |
| 25 | HIV2ts3_49 | 23272 | 57 | 81  | 3768 |

---

Note:

- 1) Particles #6, 17, and 24 are not full particles in the tomograms and were excluded from the calculation of the surface area coverage.
- 2) The radius of the Gag lattice is defined as the radius of the linker region (between  $CA_{NTD}$  and  $CA_{CTD}$ ) of the CA density layer.

## Movie S1.

**Model of a HIV-2 immature particle.** The model is generated by placing the 5.5 Å CA hexamer density onto the Gag lattice determined by the StA Dynamo Gag hexamer position calculations. The NTD of the CA proteins are colored in blue and white. The CTDs and the CA-SP1 domains are colored in orange. The color denotes how well that hexamer matches the StA model, with blue having a higher correlation coefficient score than white.

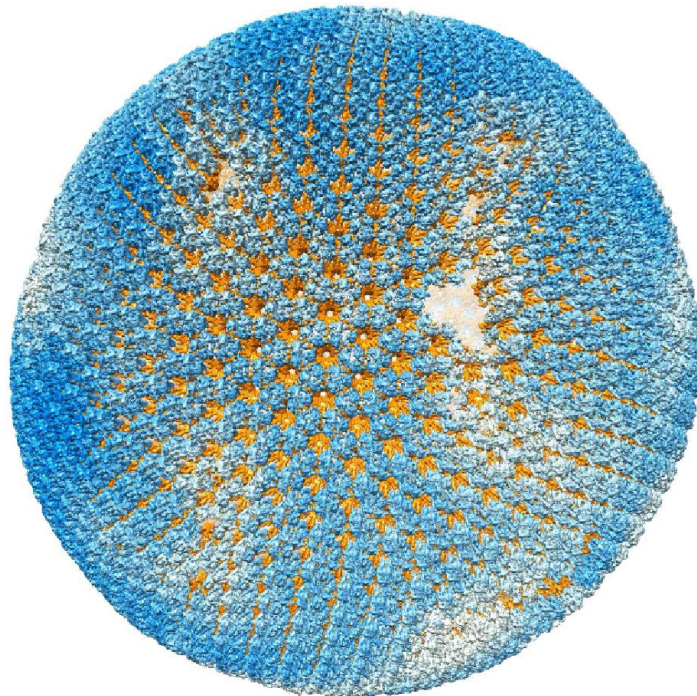

**Figure S1**

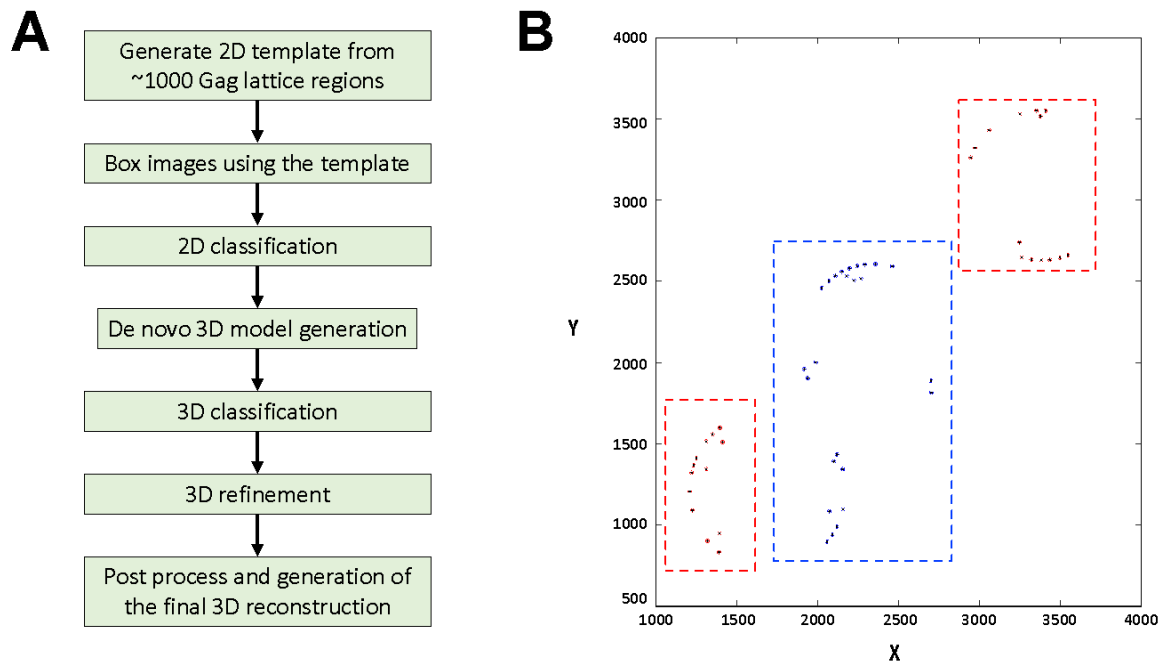

**Figure S1. Workflow of cryo-EM single particle reconstruction.** (A) The steps involved in calculating the 5.5 Å reconstruction map of HIV-2 Gag lattice structure. (B) Illustration showing the coordinates of the boxed particles sorted into two groups (blue and red) according to their locations in the micrograph. The two half sets are used for resolution determination according to gold standard refinement procedures [70]

Figure S2

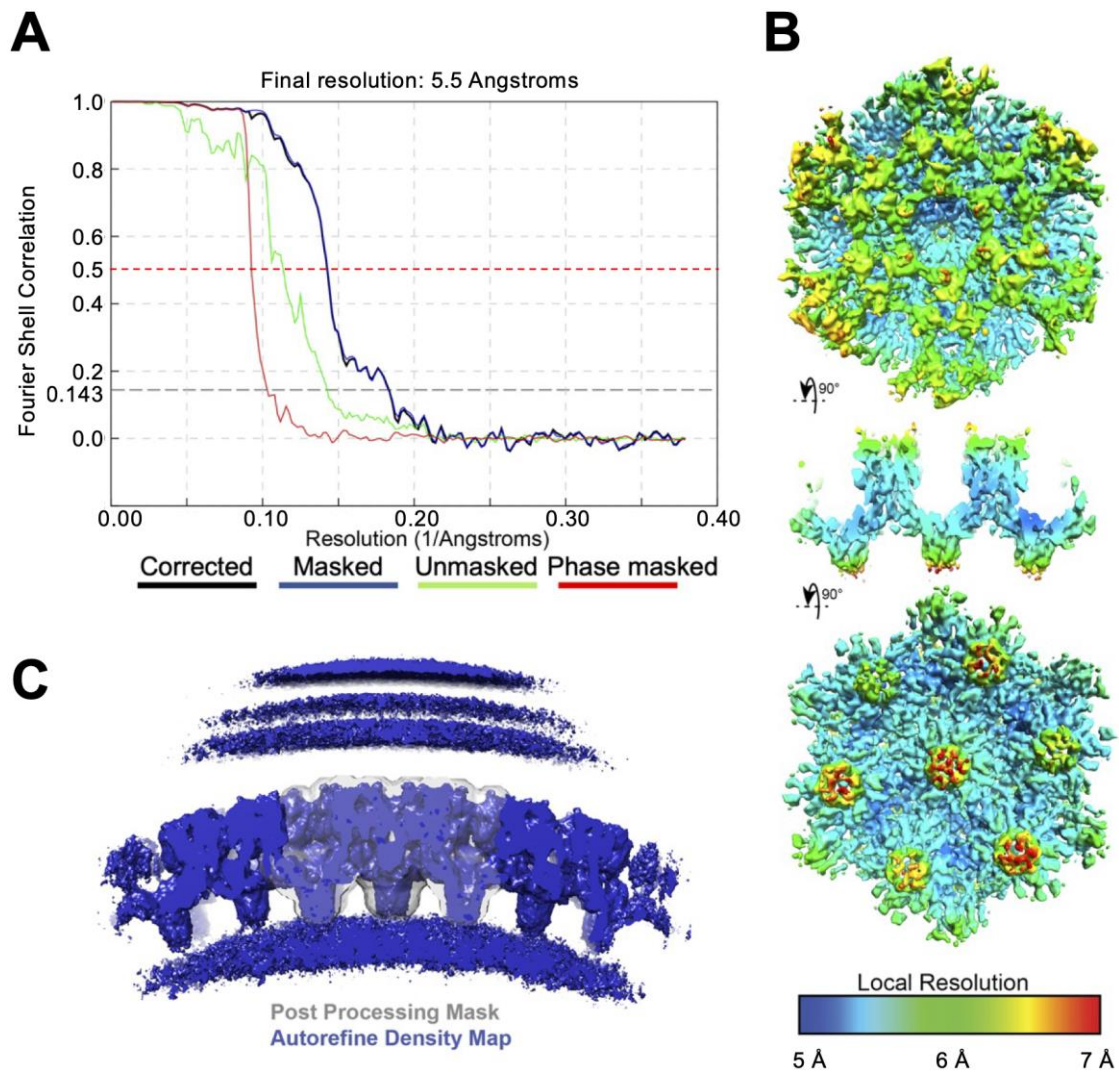

**Figure S2. Cryo-EM structure validation of SPR of HIV-2 immature particles.** (A) Gold standard FSC curves. (B) LocalRes result for the CA density in the reconstruction. (C) Central slice through the unmasked reconstruction density from 3D Autorefine along with CA mask used for generating the FSC curve in panel A.

Figure S3

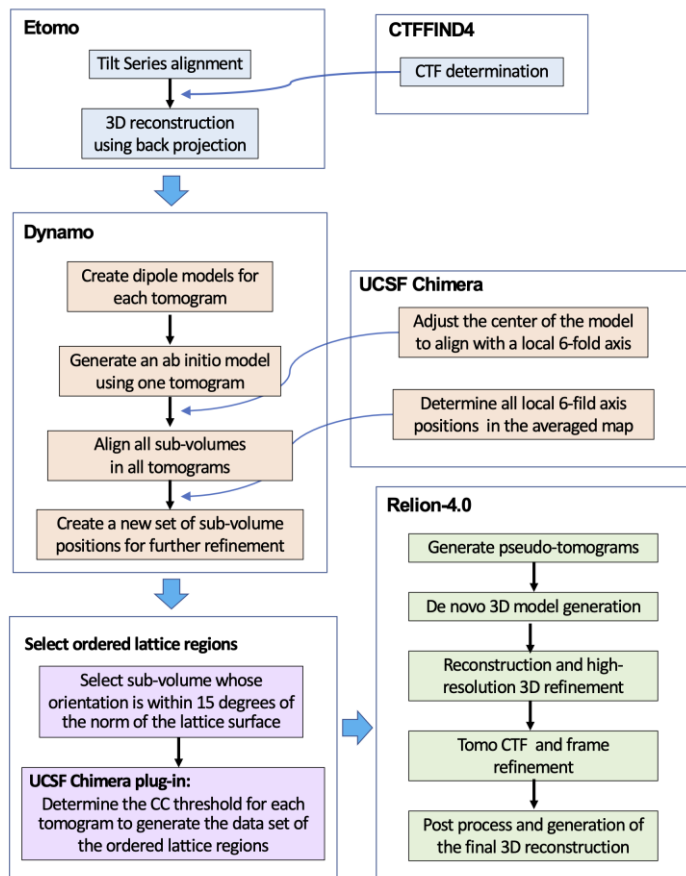

**Figure S3. Workflow of cryo-ET and sub-tomogram averaging procedure.** The software packages used in the cryo-ET and sub-tomogram averaging procedures include IMOD (Etomo) [65], CTFFIND4 [67], Dynamo [43], and RELION-4.0 [45]. The major computation steps for each software package are outlined in the respective box. The thick blue arrows represent the workflow of the sequential computational steps. The thin blue arrows represent information from CTFFIND4, and UCSF Chimera [69] is respectively integrated in the Etomo and Dynamo computations. The UCSF Chimera plug-in routine, Place Object [50], was used to determine the CC threshold for each tomogram to generate the data set of the ordered lattice regions.



Figure S4

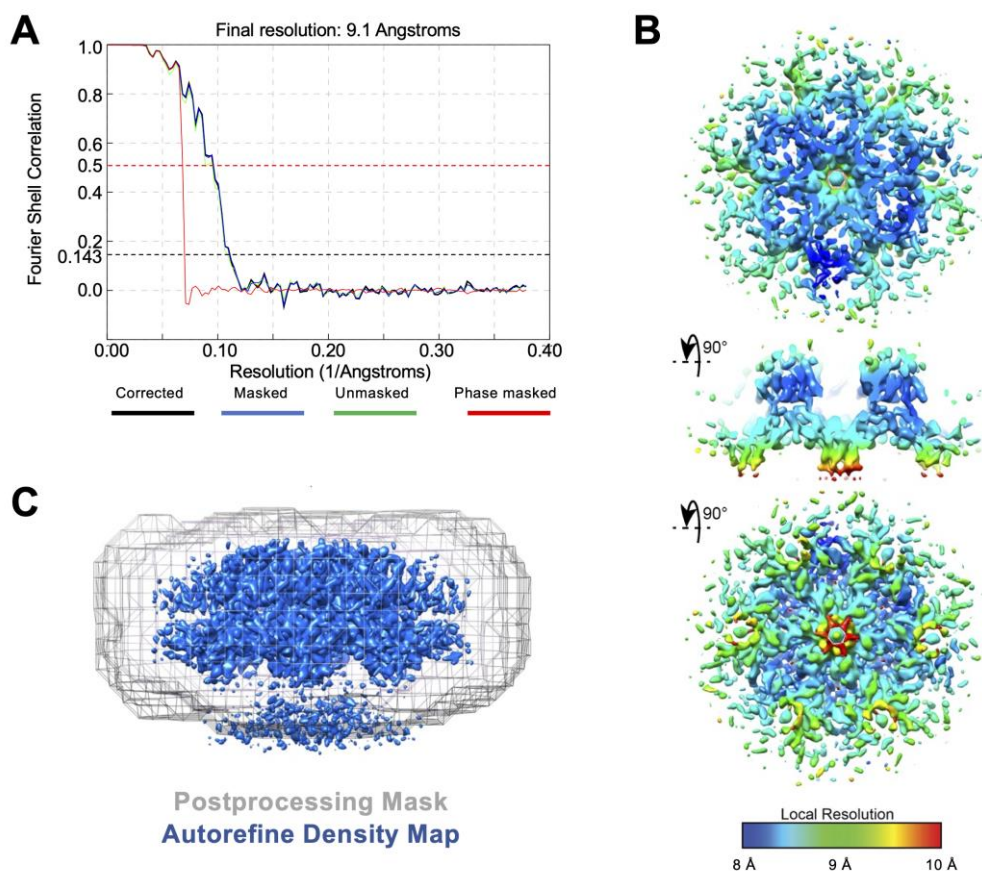

**Figure S4. Resolution validation of HIV-2 immature particle Gag hexamer structure determined by the cryo-ET and sub-tomogram averaging methods.** (A) Gold standard FSC curves. The resolution was determined to be 9.1 Å using FSC cut-off to be 0.143. (B) LocalRes result for the CA density in the reconstruction. (C) Sideview of the unmasked reconstruction density from 3D Autorefine along with the mask used for generating the FSC curve in panel A.

Figure S5

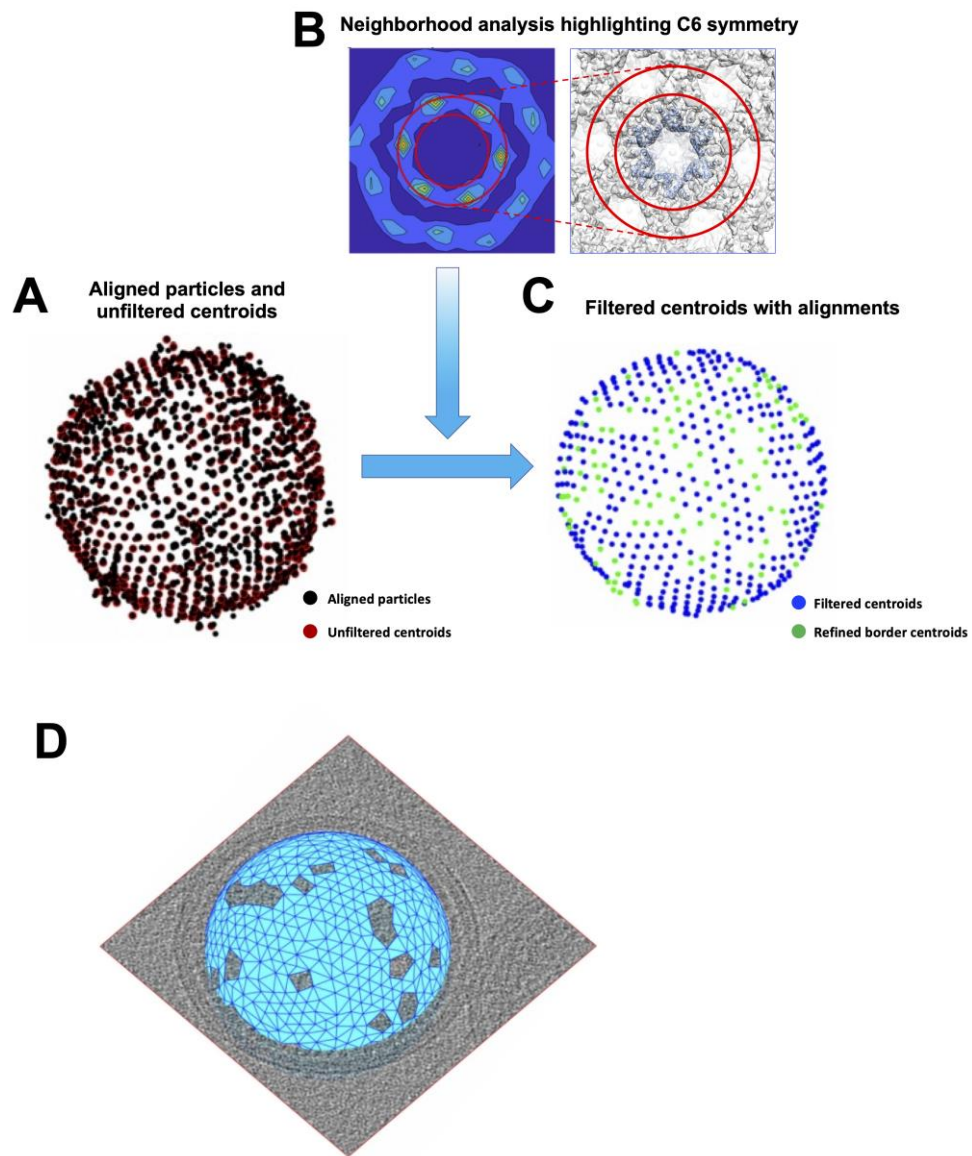

**Figure S5. Scheme of the estimation procedure for the Gag layer coverage.** (A) Estimated Gag hexamer positions based on the DBSCAN algorithm. A fine initial subtomogram sampling on the expected location of the Gag layer was used in an alignment project with the density map of a single Gag hexamer as a reference, leading to the aligned positions marked as black points. Using the DBSCAN algorithm to identify clusters of putative positions, the initial, unfiltered estimation of Gag hexamer centroids, marked as red points in the panel, are obtained. (B) The neighborhood analysis of unfiltered centroids is a region used for the neighborhood analysis of the initial estimations. The inherent C6 symmetry of the found neighboring Gag hexamer centroids is highlighted. The inner and outer red rings indicate distances of 6.6 and 7.9 nm radii respectively, corresponding to the apparent range of distances between two adjacent Gag hexamer centers. This emergence of the C6 symmetry of the Gag layer is used to filter the initial estimation of the Gag hexamer center positions. (C) Illustration of the Gag hexamer positions determined by the neighborhood analysis algorithm. As a result of this filtering, a subset of the unfiltered centroids was obtained, depicted as blue points, with a local lattice structure around them. This subset was increased by recovering the centroids in positions that follow the C6 symmetry with the filtered centroids. This allowed for refinement of the area on the borders of holes in the Gag lattice. (D) The final depiction of the Gag lattice layer on a HIV-2 immature particle. The blue mesh surface was used to calculate the percentage of the surface area that is covered by Gag hexamers.

**Figure S6**

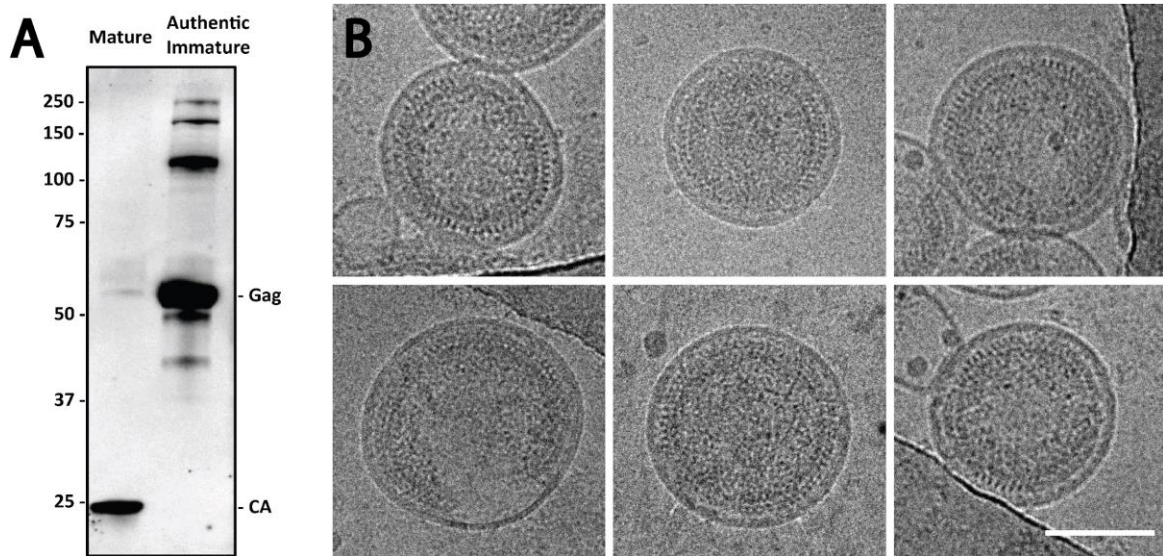

**Figure S6. Immunoblot and cryo-EM analysis of authentic immature HIV-2 particles.** (A) Immunoblot analysis of mature (WT) and authentic immature (protease catalytic domain mutant) HIV-2 particles using an anti-HIV-2 CA primary antibody which recognizes an epitope within the Gag CA region. (B) Cryo-EM images of authentic immature HIV-2 particles. The scale bar represents 100 nm.

Figure S7

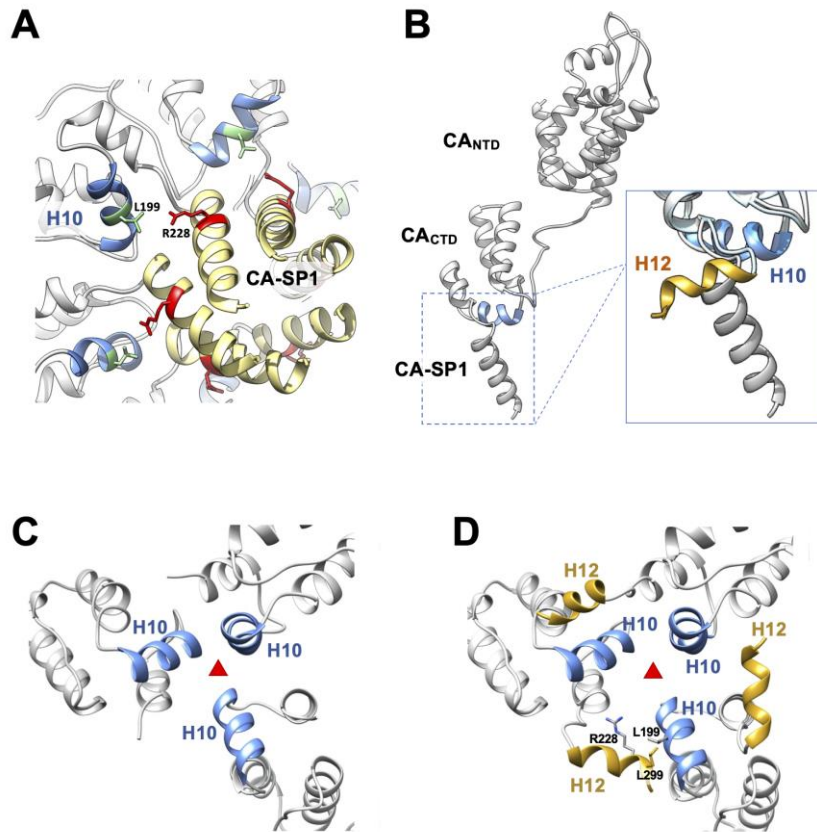

**Figure S7. Modeling implications of HIV-2 CA H12 in the immature and mature lattice configuration.** (A) Modeled HIV-2 CA and SP1 in the immature Gag lattice, showing CA-SP1 6HB (tan) and H10 (light blue). The residues L199 are colored in light green. The residues of R228 are colored red. (B) Superposition of HIV-2 CA<sub>CTD</sub> crystal structure on to the HIV-2 immature CA and SP1 model (grey). H10 is colored in light blue, and H12 is colored in gold. Structural comparison shows that H12 of the crystal structure adopts a different conformation of the CA-SP1 helix of the immature CA model. (C) Three-fold interface of mature HIV-1 CA lattice (PDB ID: 6SKN) [71] with H10 indicated in light blue. (D) Three copies of HIV-2 CA<sub>CTD</sub> fit to HIV-1 CA<sub>CTD</sub> positions, revealing putative H10-12 interfaces. The red triangle represents the three-fold symmetry axis.



Figure S8

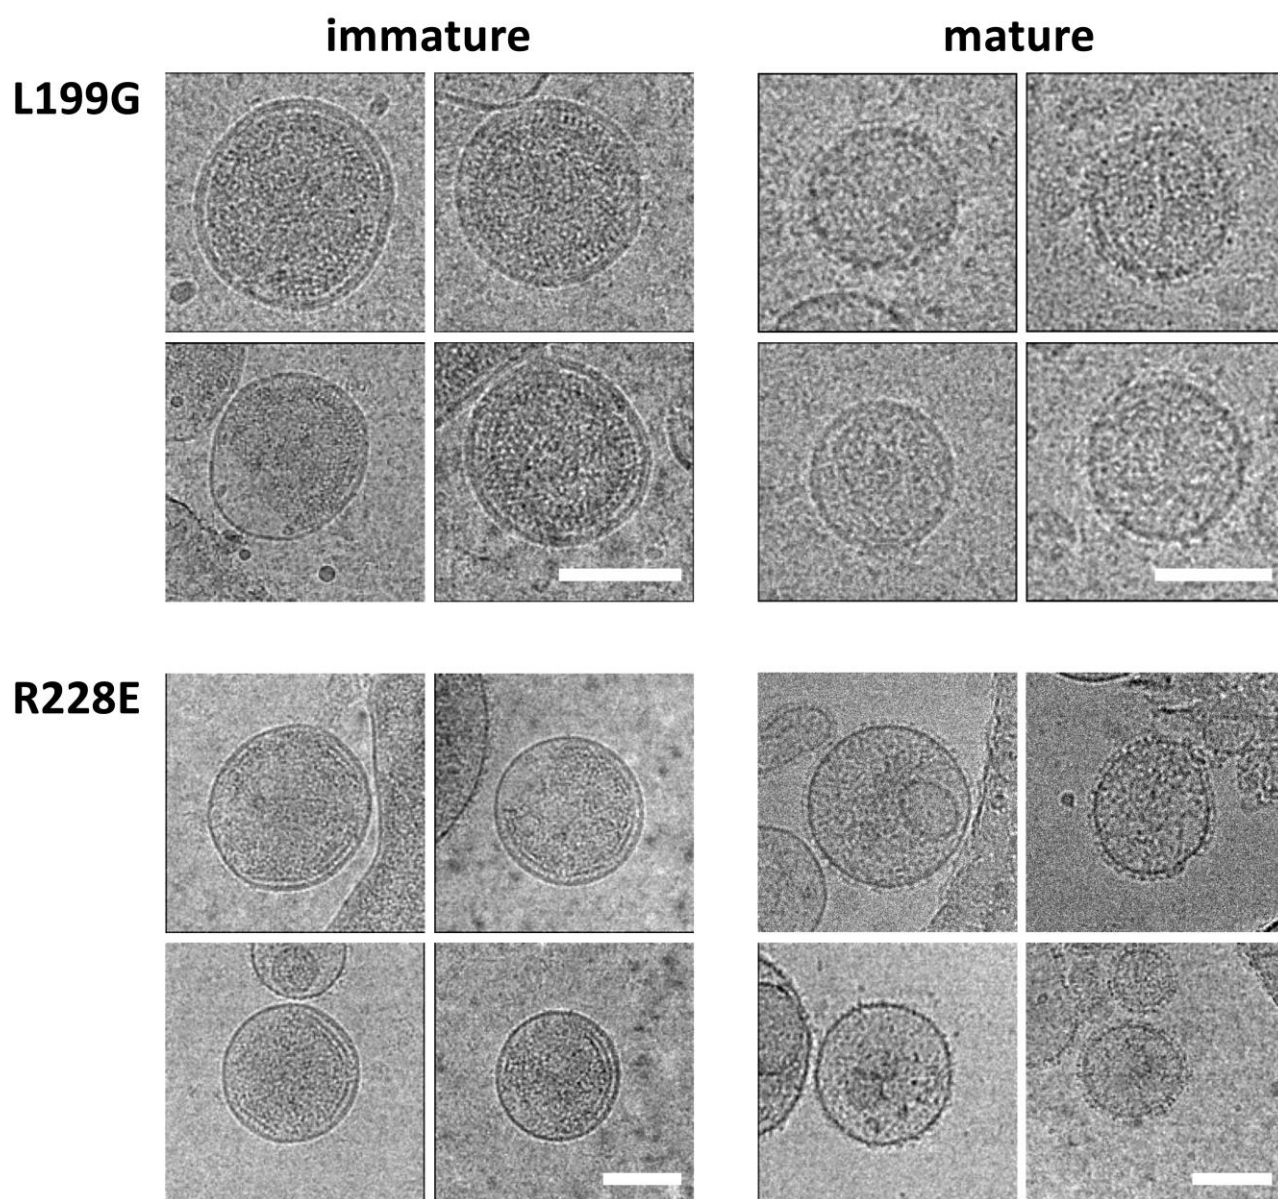

**Figure S8. Morphology of HIV-2 Gag L199G and R228E immature and mature particles.**

Cryo-EM images of the HIV-2 Gag L199G and R228E mutants reveal immature particles with ordered Gag assemblies (left) and the defective CA mature particles with the same mutations in Gag (right). The scale bars represent 100 nm.

Figure S9

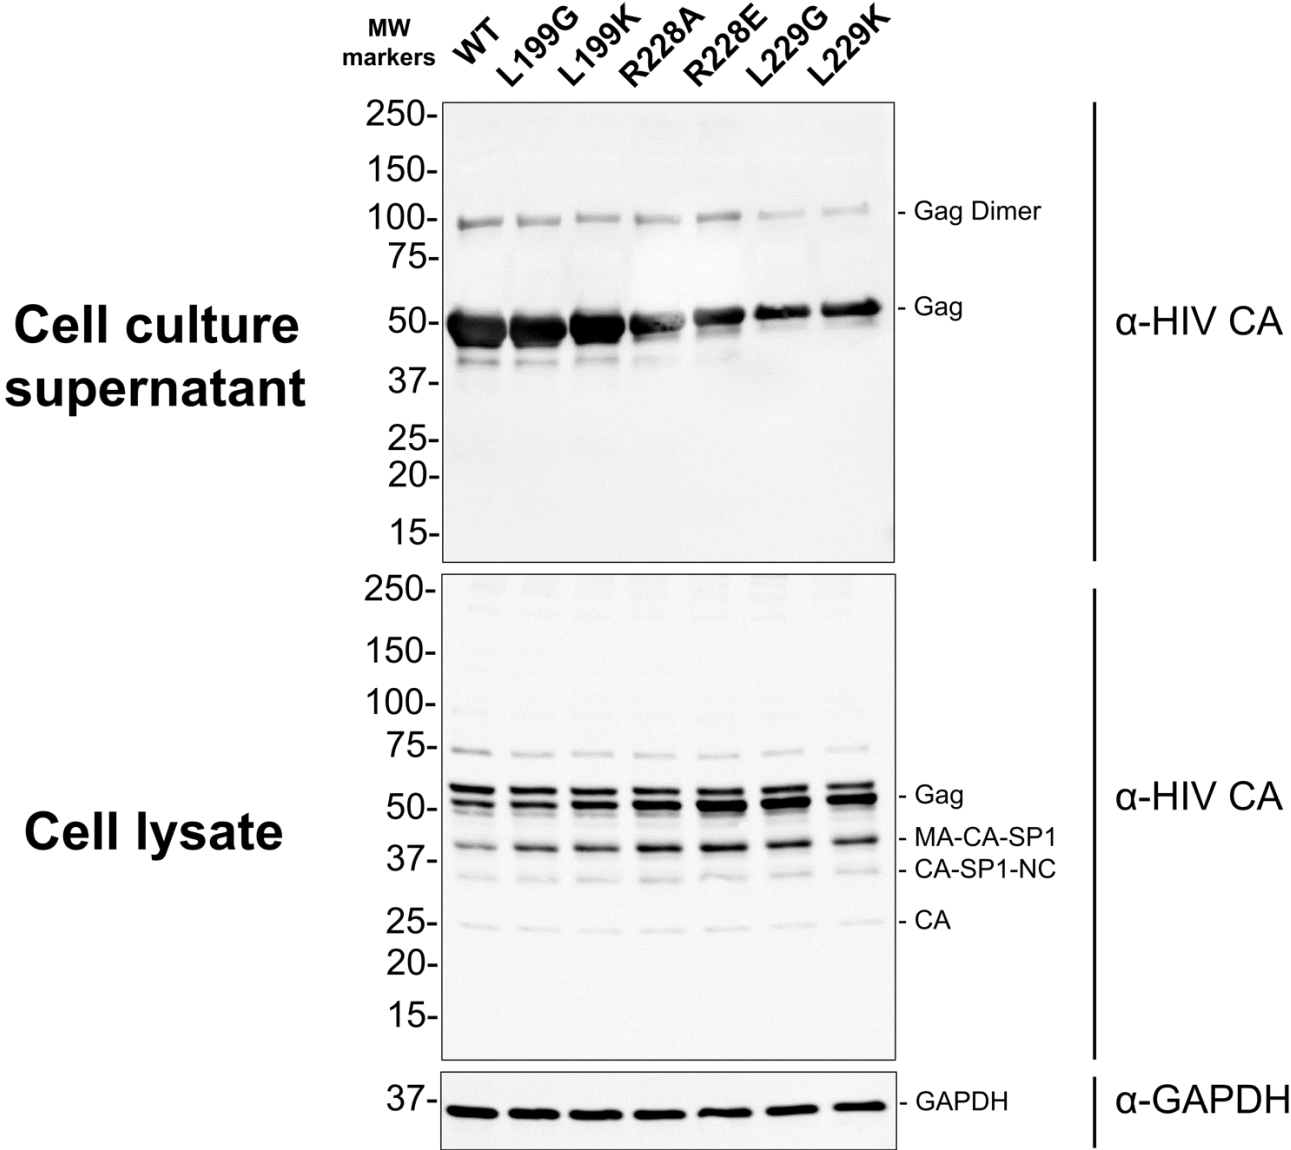

**Figure S9. Immunoblot analysis of immature particle production for HIV-2 CA mutants.** Immature particle production for HIV-2 CA mutants were analyzed by using an antibody directed against the CA domain of Gag. The Gag proteins from cell culture supernatants were detected with a 1:1500 dilution of anti-HIV-1 p24 antibody in 5% milk TBST and cell lysates were detected with 1:2000 dilution of anti-HIV-1 p24 antibody in 5% milk TBST. Glyceraldehyde 3-phosphate dehydrogenase (GAPDH) in cell lysate was detected by using a 1:10,000 anti-GAPDH antibody in 5% milk TBST. Membranes were washed before incubation with 1:5000 IRDye® 800CW goat anti-mouse IgG secondary antibody and 1:5000 IRDye® 680RD goat anti-rabbit IgG secondary antibody. Immunoblots were imaged by using a ChemiDoc Touch system and analyzed with ImageJ. Gag proteins and Gag cleavage products (i.e., Gag dimer, Gag, MA-CA-SP1, CA-SP1-NC, and CA) and GAPDH (to ensure equal loading of cell lysates) are identified. The sizes of the molecular weight (MW) markers are indicated along the left side of the immunoblot.



Figure S10

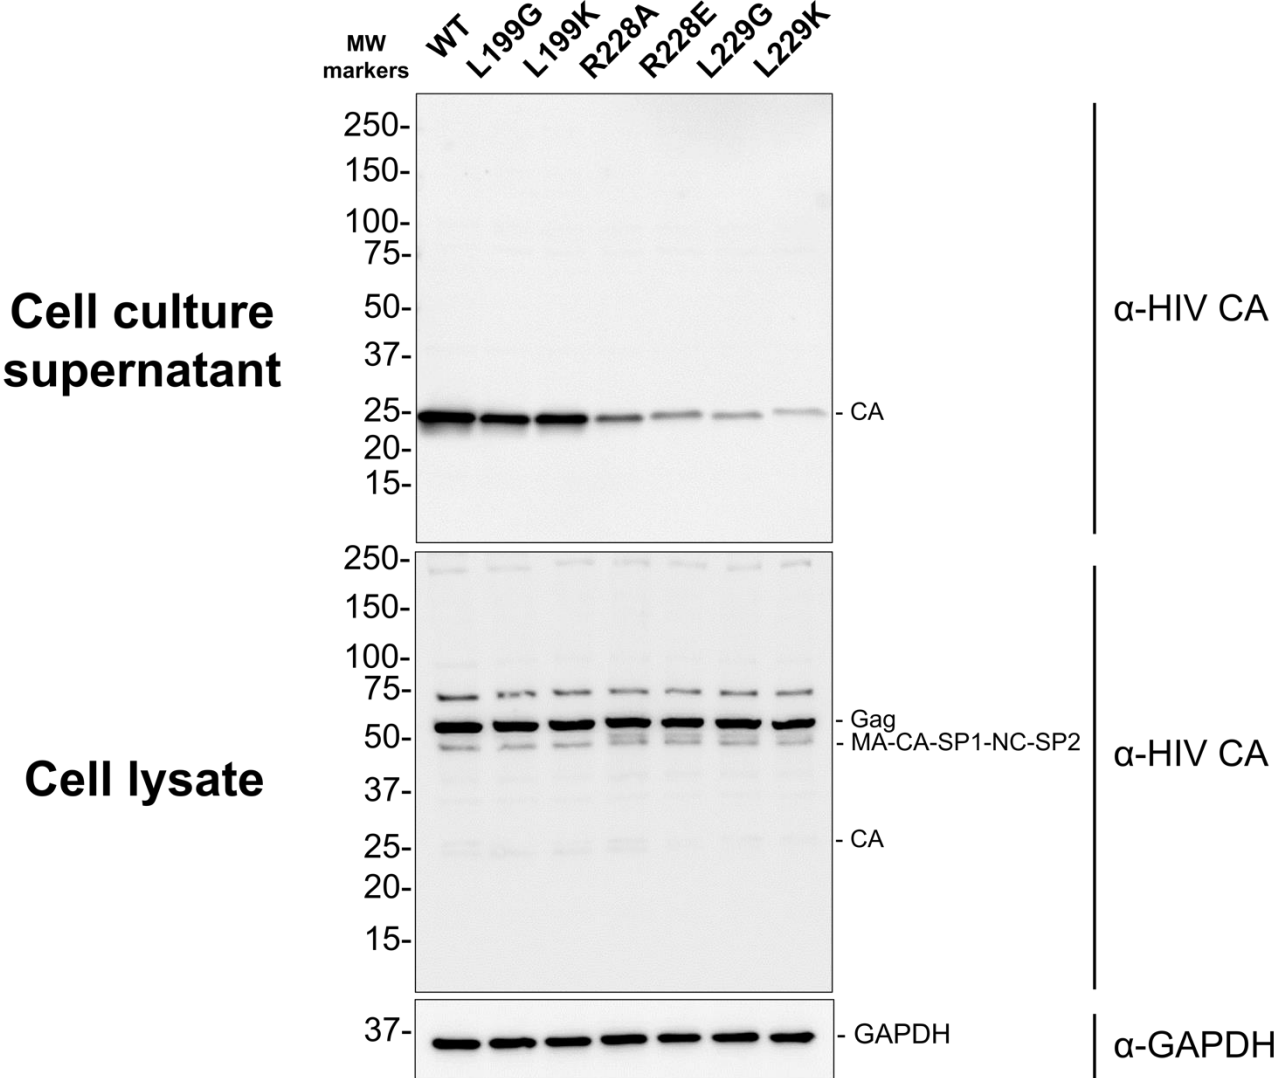

**Figure S10. Immunoblot analysis of mature particle production for HIV-2 CA mutants.** Mature particle production for HIV-2 CA mutants were analyzed by using an antibody directed against the CA domain. The CA proteins from cell culture supernatants were detected with a 1:1500 dilution of anti-HIV-1 p24 antibody in 5% milk TBST (**Figure 5B**) and cell lysates were detected with 1:2000 dilution of anti-HIV-1 p24 antibody in 5% milk TBST. Glyceraldehyde 3-phosphate dehydrogenase (GAPDH) in cell lysate was detected by using a 1:10,000 anti-GAPDH antibody in 5% milk TBST. Membranes were washed before incubation with a 1:5000 IRDye® 800CW goat anti-mouse IgG secondary antibody and 1:5000 IRDye® 680RD goat anti-rabbit IgG secondary antibody. Immunoblots were imaged by using a ChemiDoc Touch system and analyzed with ImageJ. Gag proteins and Gag cleavage products (i.e., Gag-Pol, Gag, MA-CA-SP1-NC-SP2, and CA) and GAPDH (to ensure equal loading of cell lysates) are identified. The sizes of the molecular weight (MW) markers are indicated along the left side of the immunoblot.

Figure S11

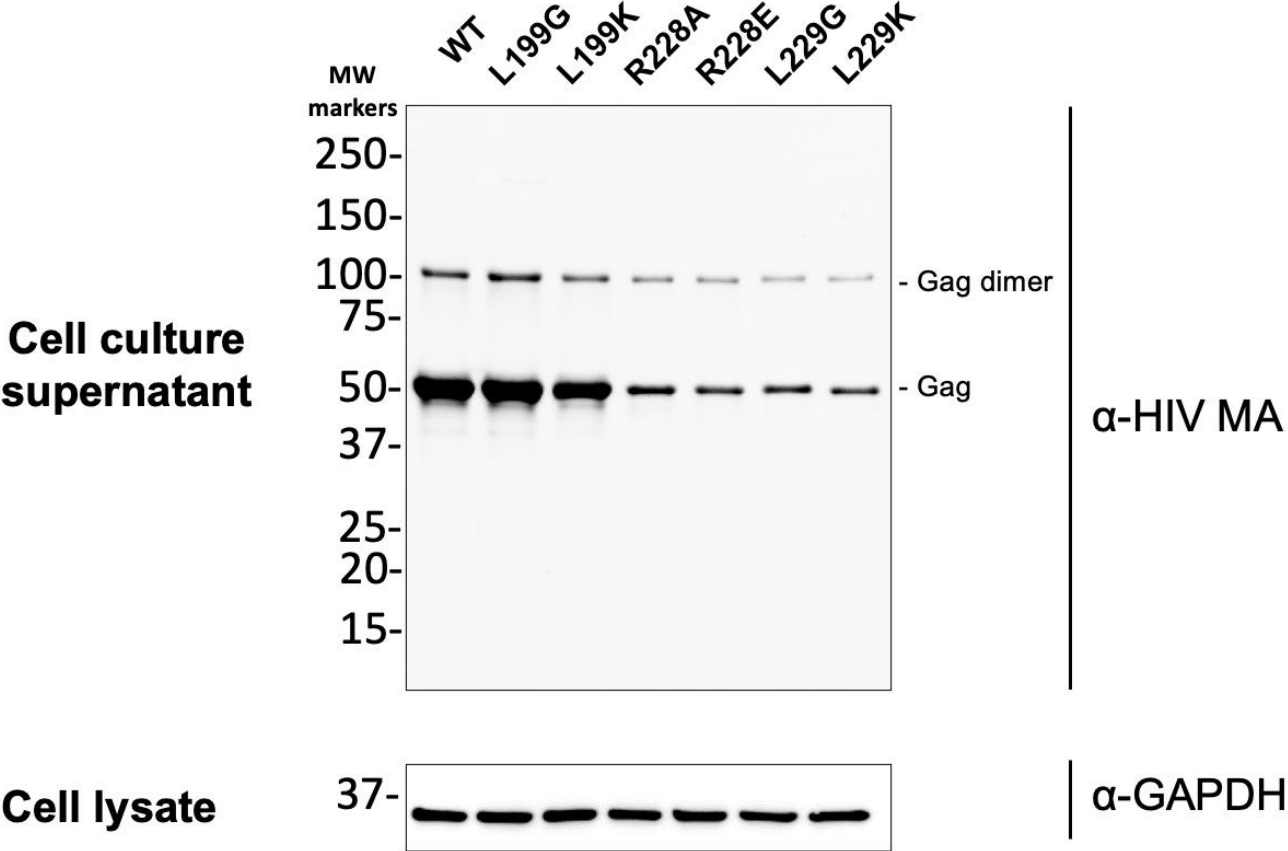

**Figure S11. Confirmation of immature particle production for HIV-2 CA mutants by using anti-MA antibody.** Immature particle production for HIV-2 CA mutants were analyzed by using an antibody directed against the MA domain of Gag (rather than an anti-CA antibody). Gag protein from culture supernatants were detected with a 1:1000 dilution of anti-HIV-1 p17 antibody in 5% milk TBST. Membranes were washed before incubation with a 1:6000 IRDye® 800CW goat anti-mouse IgG secondary antibody. Immunoblots were imaged by using a ChemiDoc Touch system and analyzed with ImageJ. Shown is a representative immunoblot from cell culture supernatant and the GAPDH from cell lysates to confirm particle production from comparable numbers of cells.
